# Supplementary material
Source: publisher site journal article supplement (https://www.spandidos-publications.com/1774/downloadSupplementary)

Figure S1. Viability of HUVECs as measured by MTT assay. HUVECs were treated with PMA, PMA + OKC, PMA + OKC + NA or PMA + IL4/13. Cell viability was determined after 48 h treatment. PMA only was used as the control group. \*\*P<0.01, \*\*\*P<0.001. PMA, phorbol-12-myristate-13-acetate; OKC, odontogenic keratocyst; NA, niflumic acid; IL, interleukin.

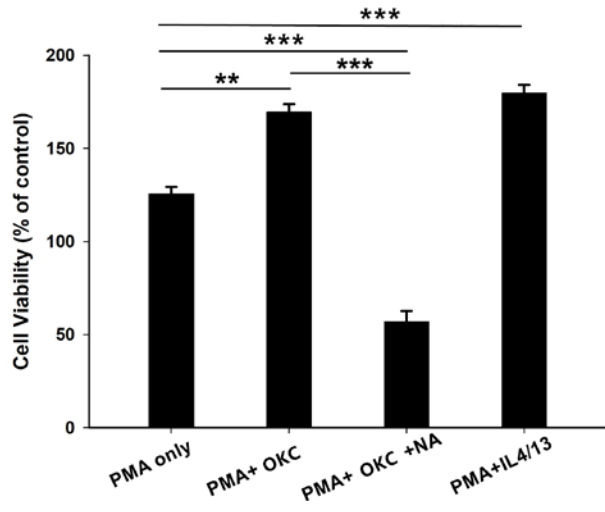

Supplement: Supplementary file 1 [file downloadSupplementary]
